# Supplementary material
Source: PubMed Central journal article supplement (PMC3980521)
Supplement: mmc1.pdf [file mmc1.pdf]

The American Journal of Human Genetics, Volume 94

Supplemental Data

**De Novo Loss-of-Function Mutations in *SETD5*, Encoding a Methyltransferase in a 3p25 Microdeletion Syndrome Critical Region, Cause Intellectual Disability**

Detelina Grozeva, Keren Carss, Olivera Spasic-Boskovic, Michael J. Parker, Hayley Archer, Helen V. Firth, Soo-Mi Park, Natalie Canham, Susan E. Holder, Meredith Wilson, Anna Hackett, Michael Field, James A.B. Floyd, UK10K Consortium, Matthew Hurles, and F. Lucy Raymond

Table S1: List of the 565 Genes that were Selected for Targeted Next Generation Sequencing

**Gene IDs**

*ABCD1*  
*ACBD6*  
*ACE2*  
*ACIN1*  
*ACOT9*  
*ACSL4*  
*ACTL6A*  
*ACTL6B*  
*ACY1*  
*ADCK3*  
*ADK*  
*ADRA2B*  
*ADSL*  
*AFF2*  
*AGA*  
*AGTR2*  
*AIMP1*  
*AKAP17A*  
*AKAP4*  
*ALDH18A1*  
*ALDH4A1*  
*ALDH5A1*  
*ALG1*  
*ALG12*  
*ALG13*  
*ALG3*  
*ALG6*  
*ALG8*  
*ANK3*  
*AP1S2*  
*AP4B1*  
*AP4E1*  
*AP4M1*  
*AP4S1*  
*ARFGEF2*  
*ARG1*  
*ARHGAP36*  
*ARHGAP6*  
*ARHGEF4*  
*ARHGEF6*  
*ARHGEF9*  
*ARID1A*

ARID1B  
ARID2  
ARIH1  
ARL14EP  
ARSF  
ARX  
ASB12  
ASCC3  
ASCL1  
ASH1L  
ASMT  
ASMTL  
ASXL1  
ATM  
ATP2B3  
ATP7A  
ATRX  
ATXN3L  
AUH  
AVPR2  
AWAT2  
BCOR  
BCORL1  
BDP1  
BMP15  
BRAF  
BRWD3  
BTK  
C12orf57  
CA8  
CACNA1F  
CACNA1G  
CAMK2A  
CAMK2G  
CAP1  
CAPN10  
CASK  
CASP2  
CC2D1A  
CC2D2A  
CCDC22  
CCDC23  
CCNA2  
CCNB3  
CD99  
CDH15

CDK16  
CDK8  
CDKL5  
CEP41  
CFP  
CHD2  
CHD7  
CHL1  
CLCN4  
CLCN5  
CLIC2  
CMC4  
CNKSR1  
CNKSR2  
CNTNAP2  
COL4A3BP  
COL4A6  
COQ5  
COX10  
CPXCR1  
CREBBP  
CRLF2  
CSF2RA  
CSTF2  
CTNNB1  
CTPS2  
CTSD  
CTTNBP2  
CUL4B  
CUX2  
CXORF22  
CXORF58  
CYP7B1  
DCHS2  
DCX  
DDOST  
DDX26B  
DDX3X  
DDX53  
DEAF1  
DGKH  
DHCR7  
DHRSX  
DHX30  
DIAPH2  
DKC1

DLG1  
DLG2  
DLG3  
DLG4  
DMD  
DNMT3B  
DOCK11  
DPF1  
DPF2  
DPF3  
DYNC1H1  
DYRK1A  
EEF1A2  
EEF1B2  
EHMT1  
EIF2C1  
EIF2S3  
ELK1  
ELP2  
ENOX2  
ENTHD2  
ENTPD1  
EP300  
EPPK1  
ERCC6  
ERLIN2  
ESX1  
EXOSC3  
FAAH2  
FAM120C  
FAM47B  
FAM58A  
FASN  
FGD1  
FKBPL  
FKRP  
FKTN  
FLNA  
FMR1  
FOXG1  
FOXP1  
FRMPD4  
FRY  
FTL  
FTSJ1  
GAB3

GABRQ  
GAD1  
GATAD2B  
GCDH  
GCH1  
GDI1  
GJC2  
GK  
GLB1  
GLRA2  
GM2A  
GON4L  
GPC3  
GPR112  
GPR56  
GPRASP1  
GRB14  
GRIA1  
GRIA2  
GRIA3  
GRIK2  
GRIN2A  
GRIN2B  
GSPT2  
GTPBP8  
HAUS7  
HCCS  
HCFC1  
HDAC4  
HDAC8  
HDHD1  
HEXA  
HEXB  
HGSNAT  
HIST1H4B  
HIST3H3  
HIVEP2  
HPRT1  
HRAS  
HS6ST2  
HSD17B10  
HSPD1  
HUWE1  
IDS  
IDUA  
IFNAR2

IGSF1  
IKBKG  
IL1RAPL1  
IL3RA  
INPP4A  
INPP5E  
IQSEC2  
ITGA4  
ITIH6  
KANK1  
KANSL1  
KAT6B  
KCNC3  
KCND1  
KCNH1  
KCNK12  
KCNQ3  
KDM1A  
KDM5A  
KDM5C  
KDM6B  
KIAA2022  
KIF1A  
KIF26B  
KIF4A  
KIF5C  
KIF7  
KIRREL3  
KLHL15  
KLHL21  
KLHL34  
KLHL4  
KMT2D  
KRAS  
L1CAM  
LAMA1  
LAMP2  
LARP7  
LAS1L  
LHFPL3  
LIMK1  
LINS  
LRP1  
LRP2  
LRRK1  
MAGEA11

MAGEB1  
MAGEB10  
MAGEB2  
MAGEC1  
MAGEC3  
MAGED1  
MAGEE2  
MAGIX  
MAGT1  
MAN1B1  
MAOA  
MAOB  
MAP2K1  
MAP2K2  
MAP3K15  
MAP7D3  
MBD5  
MBNL3  
MECP2  
MED12  
MED17  
MED23  
MEF2C  
MGAT5B  
MIB1  
MID1  
MLC1  
MLH1  
MLL3  
MLYCD  
MMAA  
MMAB  
MMADHC  
MORC4  
MSL3  
MTF1  
MTMR1  
MTMR8  
MXRA5  
MYO1D  
MYO1G  
MYT1L  
NA  
NAA10  
NDE1  
NDP



NDST1  
NDUFA1  
NECAB2  
NEU1  
NF1  
NFIX  
NHS  
NKAP  
NLGN3  
NLGN4X  
NR1I3  
NRK  
NRXN1  
NRXN2  
NSD1  
NSDHL  
NSUN2  
NTM  
NXF4  
NXF5  
OCRL  
ODF2L  
OFD1  
OGT  
OPHN1  
OR5M1  
OTC  
OXCT1  
P2RY4  
P2RY8  
PABPC5  
PAFAH1B1  
PAH  
PAK3  
PARP1  
PASD1  
PAX6  
PBRM1  
PC  
PCDH10  
PCDH19  
PCNT  
PDHA1  
PECR  
PEPD  
PGK1

PGRMC1  
PHACTR1  
PHF10  
PHF6  
PHF8  
PHIP  
PHKA1  
PIGN  
PIK3C3  
PIN4  
PJA1  
PLA2G6  
PLCXD1  
PLP1  
PLXNB3  
PNKP  
POLA1  
POLR3A  
POLR3B  
PORCN  
PPP2R5D  
PPT1  
PQBP1  
PRDX4  
PRICKLE3  
PRMT10  
PROX2  
PRPS1  
PRRG1  
PRRG3  
PRRT2  
PRSS12  
PSMA7  
PSMD10  
PTCHD1  
PTEN  
PTPN11  
PTPN21  
RAB39B  
RAB3GAP1  
RAB40AL  
RABL6  
RAF1  
RAI1  
RALGDS  
RAPGEF1

RBM10  
RENBP  
RGAG1  
RGN  
RGS7  
RLIM  
RNASET2  
RPGR  
RPS6KA3  
SATB2  
SCAPER  
SCN2A  
SCN8A  
SETBP1  
SETD5  
SETDB2  
SGSH  
SHANK1  
SHANK2  
SHANK3  
SHOC2  
SHOX  
SHROOM2  
SHROOM4  
SLC12A6  
SLC16A2  
SLC25A22  
SLC25A53  
SLC25A6  
SLC26A9  
SLC2A1  
SLC31A1  
SLC6A1  
SLC6A17  
SLC6A8  
SLC9A6  
SMARCA2  
SMARCA4  
SMARCB1  
SMARCC1  
SMARCC2  
SMARCD1  
SMARCD2  
SMARCD3  
SMARCE1  
SMC1A

SMS  
SNTG1  
SOS1  
SOX3  
SOX5  
SPG11  
SPRED1  
SPRY3  
SPTAN1  
SPTLC2  
SREBF2  
SRGAP3  
SRPX2  
ST3GAL3  
STAB2  
STAG1  
STARD8  
STXBP1  
SYN1  
SYNCRIP  
SYNE1  
SYNGAP1  
SYP  
SYT1  
SYTL4  
SYTL5  
TAF1  
TAF2  
TAF7L  
TANC2  
TAT  
TBC1D24  
TBC1D8B  
TCEAL3  
TCF4  
TCP10L2  
TENM1  
THAP1  
THOC2  
ThumpD1  
TIMM8A  
TKTL1  
TLR8  
TM4SF2  
TMEM132E  
TMEM135

TMLHE  
TNKS2  
TNPO2  
TRAPPC9  
TRES2  
TRIO  
TRMT1  
TSC1  
TSC2  
TSC22D3  
TSEN2  
TSEN34  
TSEN54  
TSPAN7  
TTI2  
TUBA1A  
TUBA8  
TUBAL3  
TUBB2B  
TUSC3  
UBE2A  
UBE3A  
UBR1  
UBR7  
UBTF  
UPF3B  
USP27X  
USP9X  
UTP14A  
VAMP7  
VLDLR  
VPS13B  
VRK1  
WAC  
WDR11  
WDR13  
WDR45L  
WDR62  
WNK3  
WWC3  
XIAP  
XKRX  
YY1  
ZBTB40  
ZC3H14  
ZCCHC12

ZCCHC8  
ZDHHC15  
ZDHHC9  
ZEB2  
ZFHX4  
ZFX  
ZFYVE26  
ZMYM3  
ZMYM6  
ZMYND12  
ZNF238  
ZNF41  
ZNF425  
ZNF526  
ZNF674  
ZNF711  
ZNF81

Table S2: Rationale for Prioritisation of Genes for Further Investigation

Top ranked genes according to number of rare variants in the ID cohort (frequency <1% 1000 genomes, UK10K twins cohort, NHLBI GO Exome Sequencing Project Exome Variant Server (NHLBI EVS), internal cohort 2172 individuals where whole exomes were sequenced at the same laboratory (UK10K) and the UK10K rare replication cohort itself (including all phenotypes))

LoF=Loss of function

| ID gene | Number observed LoF variants | Frequency in ID cohort (%) |
|---------|------------------------------|----------------------------|
| DCHS2   | 22                           | 2.2                        |
| SYNE1   | 13                           | 1.3                        |
| VPS13B  | 10                           | 1.0                        |
| MIB1    | 9                            | 0.9                        |
| NF1     | 9                            | 0.9                        |
| ATM     | 8                            | 0.8                        |
| PAH     | 7                            | 0.7                        |
| PCDH10  | 7                            | 0.7                        |
| SETD5   | 7                            | 0.7                        |
| ASCC3   | 6                            | 0.6                        |
| ATRX    | 6                            | 0.6                        |
| UTP14A  | 6                            | 0.6                        |
| HEXA    | 6                            | 0.6                        |
| CC2D2A  | 6                            | 0.6                        |
| STAB2   | 6                            | 0.6                        |

There are 15 genes in the ranking 1-10 as six genes were =10th with six observed LoF variants

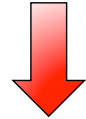

The table from above was annotated with information as to how many of the variants are independent or if the same variants have been seen in multiple individuals  
The criterion for independence was selected as it is unlikely that recurrent LoF variants in a gene will cause ID within the cohort

| ID gene | Number observed LoF variants | Frequency in ID cohort (%) | How many are independent LoFs?                                               | Number Independent LoFs |
|---------|------------------------------|----------------------------|------------------------------------------------------------------------------|-------------------------|
| DCHS2   | 22                           | 2.2                        | 6 variants seen once; 1 variant seen 2 times; 1 seen 6 times; 1 seen 8 times | 9                       |
| SYNE1   | 13                           | 1.3                        | 3 variants seen once; 1 variant seen 2 times; 1 variant seen 8 times         | 5                       |
| VPS13B  | 10                           | 1.0                        | 5 variants seen once; 1 variant seen 2 times; 1 variant seen 3 times         | 7                       |
| MIB1    | 9                            | 0.9                        | 5 variants seen once; 2 variants seen 2 times                                | 7                       |
| NF1     | 9                            | 0.9                        | 1 variant seen once; 1 variant seen 2 times; 1 variant seen 6 times          | 3                       |
| ATM     | 8                            | 0.8                        | 6 variants seen once; 1 variant seen 2 times                                 | 7                       |
| PAH     | 7                            | 0.7                        | 4 variants seen once, 1 variant seen 3 times                                 | 5                       |
| PCDH10  | 7                            | 0.7                        | 1 variant seen 7 times                                                       | 1                       |
| SETD5   | 7                            | 0.7                        | 7 variants seen once                                                         | 7                       |
| ASCC3   | 6                            | 0.6                        | 6 variants seen once                                                         | 6                       |
| ATRX    | 6                            | 0.6                        | 3 variants seen once; 1 variant seen 3 times                                 | 4                       |
| UTP14A  | 6                            | 0.6                        | 1 variant seen 6 times                                                       | 1                       |
| HEXA    | 6                            | 0.6                        | 2 variants seen once; 2 variants seen 2 times                                | 4                       |
| CC2D2A  | 6                            | 0.6                        | 6 variants seen once                                                         | 6                       |
| STAB2   | 6                            | 0.6                        | 6 variants seen once                                                         | 6                       |

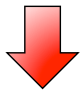

Sorted according to "Number Independent LoFs" column; Further information was added about the mode of inheritance, if it is a known or candidate gene, frequency of LoF variants in the NHLBI Exome sequencing Project and the reason why the corresponding gene is excluded from further investigation

| ID gene | Number Independent LoFs | Mode of inheritance             | Known or candidate gene | Frequency NHLBI EVS LoF | Reason exclusion further analysis                                                                                                                         |
|---------|-------------------------|---------------------------------|-------------------------|-------------------------|-----------------------------------------------------------------------------------------------------------------------------------------------------------|
| DCHS2   | 9                       | Unknown                         | Candidate               | 13                      | Difficult to make judgement about possible pathogenicity of LoF variants in this gene as many were observed a few times; in addition 13 LoFs in NHLBI EVS |
| SETD5   | 7                       | Unknown                         | Candidate               | 1                       |                                                                                                                                                           |
| ATM     | 7                       | Recessive                       | Known                   | 8                       | Known gene; recessive inheritance                                                                                                                         |
| VPS13B  | 7                       | Recessive                       | Known                   | 17                      | Known gene                                                                                                                                                |
| MIB1    | 7                       | Unknown                         | Candidate               | 13                      | Difficult to make judgement about possible pathogenicity of LoF variants in this gene as there are 12 LoF variants observed in NHLBI EVS                  |
| ASCC3   | 6                       | Recessive                       | Known                   | 7                       | Known gene; recessive inheritance                                                                                                                         |
| CC2D2A  | 6                       | Recessive or Autosomal Dominant | Known                   | 8                       | Known gene                                                                                                                                                |
| STAB2   | 6                       | Unknown                         | Candidate               | 12                      | Difficult to make judgement about possible pathogenicity of LoF variants in this gene as there are 12 LoF variants observed in NHLBI EVS                  |
| PAH     | 5                       | Recessive                       | Known                   | 4                       | Known gene                                                                                                                                                |
| SYNE1   | 5                       | Recessive                       | Known                   | 17                      | Known gene                                                                                                                                                |
| ATRX    | 4                       | Hemizygous                      | Known                   | 0                       | Known gene                                                                                                                                                |
| HEXA    | 4                       | Recessive                       | Known                   | 4                       | Known gene                                                                                                                                                |
| NF1     | 3                       | Autosomal Dominant              | Known                   | 3                       | Known gene                                                                                                                                                |
| PCDH10  | 1                       | Unknown                         | Candidate               | 1                       | No independent variants in this gene                                                                                                                      |
| UTP14A  | 1                       | Unknown                         | Candidate               | 0                       | No independent variants in this gene                                                                                                                      |

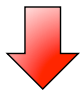

SETD5 was selected for further investigation based on:  
One of the genes with high number of independent LoFs  
Candidate gene, not previously implicated in ID  
Only one LoF observed in the publicly available data from NHLBI EVS

Table S3: Clinical Features of the Individuals with *SETD5* Mutations

| <b>FAMILY</b>                           | <b>1</b> | <b>2</b> | <b>3</b> | <b>4</b> | <b>5</b> | <b>6</b> | <b>7</b> |
|-----------------------------------------|----------|----------|----------|----------|----------|----------|----------|
| birth weight (kg)                       | 2.47     | 2.69     | 2.99     | 3.66     | 2.41     | 2.95     | small    |
| gestation (weeks)                       | 34       | 38       | term     | term     | 35+5     | term     | term     |
| Recent height (percentile)              |          | 50-75th  | 2nd      |          | 25-50th  |          |          |
| Recent weight (percentile)              |          |          | 9th      |          | 25-50th  |          |          |
| Recent Head Circumference (percentile)  | 25th     | 75-98th  | 50-75th  | 10-25th  | 75-91st  | 75th     | 10th     |
| <b>SPINE and SKELETON</b>               |          |          |          |          |          |          |          |
| leg length discrepancy                  | y        | y        |          |          |          |          |          |
| shortened 4th and 5th metacarpal        |          | y        |          |          |          |          |          |
| hypoplasia of left calf                 |          | y        |          |          |          |          |          |
| scoliosis or kyphosis                   | y        | y        |          |          |          |          |          |
| lordosis                                |          |          | y        |          |          | y        |          |
| sacral dimple                           |          | y        |          |          | y        |          |          |
| stiff legged gait                       |          |          |          |          | y        | y        |          |
| bilateral 5th finger clinodactyly       |          |          | y        |          |          |          |          |
| brachdactyly                            |          |          | y        |          |          |          |          |
| post axial polydactyly; 2 hands, 1 foot |          |          |          | y        |          |          |          |
| <b>EARS</b>                             |          |          |          |          |          |          |          |
| large ears                              | y        |          | y        |          |          |          |          |
| fleshy ear lobes                        |          | y        |          |          | y        |          |          |
| long, narrow, low set ears              |          |          | y        |          |          |          | y        |
| preauricular pit                        | y        |          |          |          |          |          |          |
| <b>EYEBROWS</b>                         |          |          |          |          |          |          |          |
| full eyebrows                           |          | y        |          |          |          |          |          |
| synophrys                               | y        |          | y        |          |          |          | y        |
| straight eyebrows                       | y        |          |          |          |          |          |          |
| broad eyebrows                          |          |          |          |          |          |          | y        |
| cysts in eyebrows                       |          |          |          |          | y        |          |          |
| <b>HEAD SHAPE</b>                       |          |          |          |          |          |          |          |
| brachycephaly                           | y        | y        |          |          |          |          | y        |
| prominent high forehead                 |          |          |          |          | y        |          |          |
| <b>NOSE</b>                             |          |          |          |          |          |          |          |
| broad, thickened upturned nasal tip     |          | y        |          |          | y        |          |          |
| depressed nasal bridge                  |          | y        |          |          | y        | y        |          |
| anteverted nares                        |          | y        |          |          | y        |          |          |
| prominent high nasal root               |          |          | y        | y        | y        |          | y        |
| tubular nose                            | y        |          |          | y        | y        | y        |          |
| prominent nares                         |          |          | y        |          |          |          |          |
| <b>EYES</b>                             |          |          |          |          |          |          |          |
| left eye amblyopia                      |          | y        |          |          |          |          |          |
| long narrow fissures                    |          |          | y        |          | y        |          |          |
| mild ptosis                             |          |          |          |          | y        |          |          |
| nystagmus and strabismus                |          |          |          | y        |          |          |          |
| down slanting palpebral fissures        |          |          |          |          |          |          | y        |
| upslanting palpebral fissures           | y        |          | y        | y        | y        | y        |          |
| <b>MOUTH and LOWER FACE</b>             |          |          |          |          |          |          |          |
| long, smooth philtrum                   | y        | y        | y        | y        | y        |          |          |
| small mouth                             |          |          |          | y        |          |          | y        |
| short philtrum                          |          |          |          |          |          |          | y        |
| micrognathia                            | y        |          |          | y        |          |          | y        |
| thin upper lip                          | y        | y        | y        |          | y        |          | y        |
| high palate                             | y        |          |          |          |          |          | y        |



| <b>FEEDING AND SWALLOWING</b>          |   |   |  |  |   |   |   |
|----------------------------------------|---|---|--|--|---|---|---|
| feeding difficulties                   | y | y |  |  |   |   |   |
| crowded teeth                          |   | y |  |  |   | y | y |
| dribbling                              |   |   |  |  | y | y | y |
| difficulty chewing, oromotor dyspraxia |   |   |  |  | y | y |   |
| swallowing difficulties                |   | y |  |  |   | y |   |

| <b>BEHAVIOUR and DEVELOPMENT</b>       |          |           |            |          |             |                |                 |
|----------------------------------------|----------|-----------|------------|----------|-------------|----------------|-----------------|
| developmental delay                    | y        | y         | y          | y        | y           | y              | y               |
| walking (age)                          | y (2yrs) | y (3yrs)  | y (18mths) |          | y (2yrs)    | y (3yrs 2mths) | y (20mths)      |
| speech (age first words)               | y (4yrs) | y (4 yrs) | y (12mths) | y (late) | y (18 mths) | y (2 years)    |                 |
| expressive language delay              |          |           |            |          | y           | y              | y               |
| stammer                                | y        |           | y          | y        |             |                |                 |
| exaggerated startle response           |          |           |            |          |             | y              | y               |
| involuntary movements                  |          |           | y          |          |             | y              | y (until 10yrs) |
| hand flapping and ritualised behaviour | y        | y         |            |          | y           |                |                 |
| autistic                               | y        |           |            |          |             | y              |                 |
| obsessive compulsive disorder          | y        |           |            |          |             | y              | y               |

| <b>CONGENITAL HEART DISEASE</b> |   |   |  |  |  |  |  |
|---------------------------------|---|---|--|--|--|--|--|
| mitral valve prolapse           |   | y |  |  |  |  |  |
| VSD, PDA                        | y |   |  |  |  |  |  |

| <b>ABDOMINAL ORGAN DEVELOPMENT</b> |   |   |   |  |   |  |   |
|------------------------------------|---|---|---|--|---|--|---|
| paraumbilical hernia               |   |   |   |  | y |  |   |
| inguinal hernia                    |   | y |   |  |   |  | y |
| undescended testes                 |   | y |   |  | y |  |   |
| hypospadias                        | y |   | y |  |   |  |   |
| nocturnal enuresis                 |   |   |   |  |   |  | y |

| <b>OTHER</b>        |  |   |   |  |   |   |   |
|---------------------|--|---|---|--|---|---|---|
| fetal finger pads   |  | y |   |  |   |   |   |
| spiky hair          |  | y |   |  |   |   |   |
| saggy skin          |  |   |   |  | y |   |   |
| low hairline        |  |   | y |  |   | y | y |
| severe constipation |  |   | y |  |   | y |   |
