# Supplementary material
Source: PubMed Central journal article supplement (PMC3980521)
Supplement: mmc2.pdf [file mmc2.pdf]

# De Novo Loss-of-Function Mutations in *SETD5*, Encoding a Methyltransferase in a 3p25 Microdeletion Syndrome Critical Region, Cause Intellectual Disability

Detelina Grozeva,<sup>1</sup> Keren Carss,<sup>2</sup> Olivera Spasic-Boskovic,<sup>1</sup> Michael J. Parker,<sup>3</sup> Hayley Archer,<sup>4</sup> Helen V. Firth,<sup>5</sup> Soo-Mi Park,<sup>5</sup> Natalie Canham,<sup>6</sup> Susan E. Holder,<sup>6</sup> Meredith Wilson,<sup>7</sup> Anna Hackett,<sup>8</sup> Michael Field,<sup>9</sup> James A.B. Floyd,<sup>2,10</sup> UK10K Consortium,<sup>2</sup> Matthew Hurles,<sup>2</sup> and F. Lucy Raymond<sup>1,\*</sup>

To identify further Mendelian causes of intellectual disability (ID), we screened a cohort of 996 individuals with ID for variants in 565 known or candidate genes by using a targeted next-generation sequencing approach. Seven loss-of-function (LoF) mutations—four nonsense (c.1195A>T [p.Lys399\*], c.1333C>T [p.Arg445\*], c.1866C>G [p.Tyr622\*], and c.3001C>T [p.Arg1001\*]) and three frameshift (c.2177\_2178del [p.Thr726Asnfs\*39], c.3771dup [p.Ser1258Glufs\*65], and c.3856del [p.Ser1286Leufs\*84])—were identified in *SETD5*, a gene predicted to encode a methyltransferase. All mutations were compatible with de novo dominant inheritance. The affected individuals had moderate to severe ID with additional variable features of brachycephaly; a prominent high forehead with synophrys or striking full and broad eyebrows; a long, thin, and tubular nose; long, narrow upslanting palpebral fissures; and large, fleshy low-set ears. Skeletal anomalies, including significant leg-length discrepancy, were a frequent finding in two individuals. Congenital heart defects, inguinal hernia, or hypospadias were also reported. Behavioral problems, including obsessive-compulsive disorder, hand flapping with ritualized behavior, and autism, were prominent features. *SETD5* lies within the critical interval for 3p25 microdeletion syndrome. The individuals with *SETD5* mutations showed phenotypic similarity to those previously reported with a deletion in 3p25, and thus loss of *SETD5* might be sufficient to account for many of the clinical features observed in this condition. Our findings add to the growing evidence that mutations in genes encoding methyltransferases regulating histone modification are important causes of ID. This analysis provides sufficient evidence that rare de novo LoF mutations in *SETD5* are a relatively frequent (0.7%) cause of ID.

The identification of over 100 rare but highly penetrant X chromosome genes in which mutations cause intellectual disability (ID) supports the hypothesis that the human genome contains more than 2,000 genes critical to normal intellectual development.<sup>1</sup> When the causative variants are rare and when candidate genes are numerous, the interpretation of a single novel variant in a gene not previously associated with disease is challenging. The recent analysis by Piton et al. looked at evidence of pathogenicity for many of the X chromosome genes in which mutations are reported to cause ID and elegantly demonstrated how previously published evidence of disease causality needs careful review in the light of sequence data of large population sets.<sup>2</sup> As our knowledge of rare variants in the normal population increases, there is a need to establish increasingly stringent criteria to evaluate whether a disease-causing variant has been identified to ensure the accurate translation of new knowledge into safe clinical practice.<sup>3</sup>

In order to identify further Mendelian causes of ID, we screened 996 ID-affected individuals for variants in previously associated genes and candidate genes for ID on the basis of current literature, in-house data, and sequence

homology to genes previously implicated in ID. The appropriate ethical approval was obtained (research ethics committee reference 03/0/014), and parents or guardians provided written informed consent. We performed DNA sequence analysis by using next-generation sequencing methods to investigate the coding sequence of 565 genes (Table S1, available online) from 996 individuals with moderate to severe ID (all samples met DNA quality metrics). This was a subset of a large replication study of seven rare diseases and comprised a total of 2,812 individuals who were investigated within the UK10K study. The phenotypes studied were congenital heart disease, ciliopathy, coloboma, ID, neuromuscular disease, severe insulin resistance, and congenital thyroid disease; internal technical control samples were also included for comparison.

The GenomiPhi V2 DNA Amplification Kit (GE Healthcare) was used for whole-genome amplification of the DNA used for sequence analysis with the use of 1  $\mu$ l of 10 ng/ $\mu$ l template DNA prior to pull-down. A custom-based targeted Agilent SureSelect pull-down array was designed with the SureDesign program (Agilent Technologies). This target was 3.4 Mb of sequence from the coding exons (GRCh37/hg19 human reference sequence, UCSC

<sup>1</sup>Department of Medical Genetics, Cambridge Institute for Medical Research, University of Cambridge, Cambridge CB2 0XY, UK; <sup>2</sup>The Wellcome Trust Sanger Institute, Wellcome Trust Genome Campus, Hinxton, Cambridge CB10 1SA, UK; <sup>3</sup>Sheffield Clinical Genetics Service, Sheffield Children's Hospital, Western Bank, Sheffield S10 2TH, UK; <sup>4</sup>Institute of Medical Genetics, University Hospital of Wales, Heath Park, Cardiff CF14 4XW, UK; <sup>5</sup>Clinical Genetics, Addenbrooke's Treatment Centre, Cambridge University Hospitals NHS Foundation Trust, Hills Road, Cambridge CB2 0QQ, UK; <sup>6</sup>North West Thames Regional Genetics Service (Kennedy Galton Centre), North West London Hospitals NHS Trust, Harrow, Middlesex HA1 3UJ, UK; <sup>7</sup>Department of Clinical Genetics, Children's Hospital at Westmead, Westmead, NSW 2145, Australia; <sup>8</sup>Genetics of Learning Disability Service, Hunter Genetics, Waratah, NSW 2298, Australia; <sup>9</sup>Department of Medical Genetics, Royal North Shore Hospital, St. Leonards, NSW 2298, Australia; <sup>10</sup>The Genome Centre, John Vane Science Centre, Queen Mary University of London, Charterhouse Square, London EC1M 6BQ, UK

\*Correspondence: flr24@cam.ac.uk

<http://dx.doi.org/10.1016/j.ajhg.2014.03.006>. ©2014 by The American Society of Human Genetics. All rights reserved.

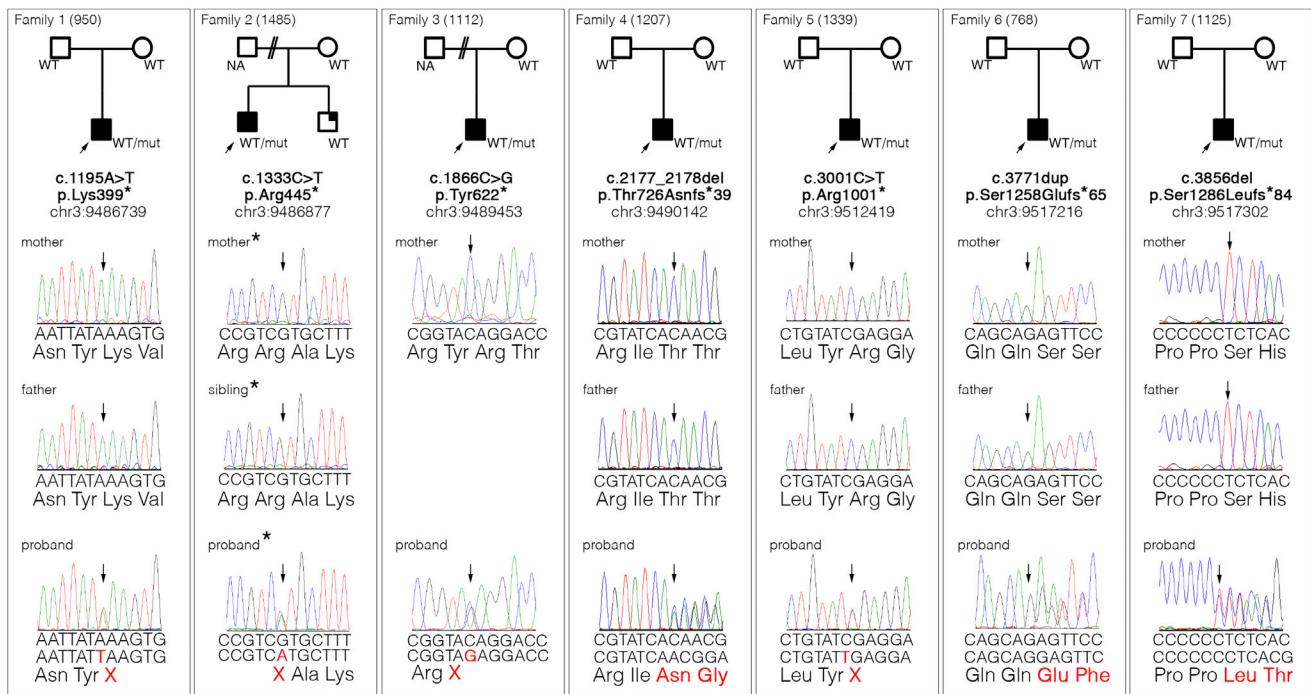

**Figure 1. Families Affected by *SETD5* Mutations**

The pedigree for each family is shown at the top. Sanger sequencing electropherograms of the mutations are shown below the pedigrees. An arrow indicates the position of the mutation. The genomic coordinates are according to the GRCh37/hg19 human reference sequence. Abbreviations are as follows: NA, not available; WT, wild-type; and mut, mutation. Asterisks indicate that the Sanger sequencing illustration is of the reverse strand.

Genome Browser) of 1,189 genes, of which 565 were ID-related candidate or known genes. Target enrichment and amplification were performed with the HaloPlex Target Enrichment Kit (Agilent Technologies) according to the manufacturer's instructions. The Illumina HiSeq 2000 platform was used to sequence the exons from the targeted regions. Reads were aligned to the reference genome (GRCh37/hg19) with the Burrows-Wheeler Aligner, and single-nucleotide variants (SNVs) and small indels were identified with SAMtools.<sup>4,5</sup> For each sample, variants sites (SNVs and indels) were called with the Genome Analysis Toolkit Unified Genotyper.<sup>6</sup> The calls were then annotated with vcf-annotate (VCFtools).<sup>7</sup> Functional annotations were added with the Ensembl Variant Effect Predictor v.2.8 against Ensembl 70.<sup>8</sup> Standard sequence quality-control criteria were applied to the called variants: variants with a Phred-scaled quality score > 40 and a mapping quality score > 50 were investigated further. The Integrative Genomics Viewer was used for visually inspecting the underlying sequencing data.<sup>9</sup> In addition, only rare variants with a minor allele frequency < 1% in all of the following data sets were considered for downstream analyses: 1000 Genomes, the UK10K twins cohort, the NHLBI Exome Sequencing Project (ESP), a cohort of 2,172 individuals from whom whole exomes were sequenced at the same laboratory (UK10K), and the UK10K rare replication cohort itself (including all phenotypes). Furthermore, only putative

loss-of-function (LoF) variants (nonsense, frameshift, and essential splice-site variants) were analyzed.

We selected the top ten genes with the highest number of rare LoF variants present at frequencies < 1% (Table S2). We then prioritized the genes for more detailed follow-up on the basis of the following information: (1) the number of different independent LoF variants identified in this cohort, (2) the presence of these variants in a candidate gene, and (3) the paucity of rare LoF variants in the candidate genes in controls according to frequencies in the NHLBI ESP. On the basis of the above, SET-containing-domain 5 (*SETD5*) was selected for further investigation.

Seven independent LoF variants were identified within the coding sequence of *SETD5* in the ID cohort (Figure 1). All seven variants were observed only once within the whole UK10K replication cohort of 2,812 individuals with rare disease. The total number of *SETD5* haplotypes sequenced was 5,624, which represents 1,992 alleles from individuals with ID and 3,632 alleles from individuals with other rare diseases not usually associated with ID. None of these seven LoF variants have been reported in PubMed, ClinVar, HGMD, dbSNP, or 1000 Genomes, and none were identified in the NHLBI ESP, where coverage of the respective exons was available for >4,000 European American individuals. Because none of the individuals within the cohorts contributing to the current data deposited in the NHLBI ESP were

described as having intellectual impairment, this was used as an additional independent control set. The seven LoF variants within *SETD5* (CCDS46741.1, RefSeq accession number NM\_001080517.1) and their corresponding protein truncations (RefSeq NP\_001073986.1) are the following: c.1195A>T (p.Lys399\*), c.1333C>T (p.Arg445\*), c.1866C>G (p.Tyr622\*), c.2177\_2178del (p.Thr726Asnfs\*39), c.3001C>T (p.Arg1001\*), c.3771dup (p.Ser1258Glufs\*65), and c.3856del (p.Ser1286Leufs\*84) (Figure 1).

We confirmed all of the variants by Sanger sequence analysis by using stored nonamplified genomic DNA from the probands and performed familial segregation analysis to test a de novo hypothesis of disease (Figure 1). For 5/7, we were able to establish molecular evidence of a de novo variant in the proband. For the two families for which a paternal sample was unavailable, the variant was absent from the maternal sample and both parents were reported clinically to have normal intellect, suggesting that de novo inheritance was the most likely cause of disease in these families. In one of the families (family 2) with no paternal sample available, a sibling with a mild intellectual impairment was found not to carry the mutation. The number of de novo LoF variants expected to occur by chance in *SETD5* in a cohort of this size was calculated with the use of the known exome mutation rate,<sup>10</sup> the proportion of variants expected to be LoF,<sup>11</sup> and the length of the coding sequence of *SETD5* (4,329 bp). We compared this number to the observed number (five) of molecularly confirmed de novo LoF variants in *SETD5* in our cohort and found that the probability that they occurred independently by chance was extremely low ( $p = 5.25 \times 10^{-9}$ , corrected for multiple testing). These results indicate that rare LoF mutations in *SETD5* are a likely cause of ID.

The CCDS46741.1 transcript of the coding sequence of *SETD5* is 4,329 bp long and encodes a protein of 1,442 amino acids. In this transcript, we found only one LoF variant listed in public databases: a 4 bp polymorphic indel (c.4277\_4280del [p.Arg1426Profs\*82]) with genomic position chr3: 9,517,722. This LoF variant is located within the terminal 16 amino acids of the protein and is reported in 38/3,904 European American adults (from the NHLBI ESP). The seven *SETD5* LoF variants present in the ID cohort are all within the CCDS46741.1 sequence and contribute to the major consensus transcript. The mutations are all located upstream of the single polymorphic LoF variant reported in the NHLBI ESP at the 3' end of the gene. We then performed further analysis of the DNA sequence from the affected individuals to identify whether there were other more plausible variants that could account for disease. In 6/7 individuals, we did not identify further rare LoF or missense variants in any of the interrogated known genes in which mutations cause syndromic or nonsyndromic ID, nor were there rare LoF variants in candidate genes (565 genes in total). In the family 2 proband, we did identify an essential splice-site variant (c.2914+1G>A, genomic position chr3: 433,481, RefSeq

NM\_006614.3) in *CHL1* (MIM 607416), a candidate gene not previously associated with ID. This variant was only present in the proband and was absent in the mother and mildly affected brother. In addition, in the family 2 proband, we observed a single missense variant (c.179A>G, RefSeq NM\_004595.4) in *SMS* (MIM 300105), an X-linked gene in which mutations are reported to cause ID (Snyder-Robinson syndrome [MIM 309583]) in males. The variant was present in the unaffected mother and mildly impaired brother of the proband. The residue is not well conserved throughout evolution and is not located within a conserved domain of the protein. We concluded that this was not likely to be the primary cause of disease in the family. Furthermore, the phenotype of the mildly affected brother was not in keeping with Snyder-Robinson syndrome. Thus, it is uncertain whether this variant makes any additional contribution to the phenotype. The presence of the *SETD5* variant in the proband and the absence of the variant in the younger brother are compatible with the more severe clinical features in the older brother. The additional contribution of the *CHL1* variant in the proband remains uncertain.

On the basis of the genotypic similarity of the seven affected individuals, the clinical phenotype of each individual was collated from the recruiting physicians, who were blinded to the genotype for minimizing clinical bias in reporting (Figure 2). One family declined permission to publish photographs but permitted review by S.E.H. and F.L.R. Although the clinical features were variable, a number of common features other than ID included a similar facial morphology comprising brachycephaly and a prominent high forehead with striking eyebrows described as full, broad, straight, or with synophrys. The nose morphology was long, thin, and tubular. The morphology around the eyes was similar with long, narrow, and upslanting palpebral fissures; in addition, mild ptosis, unilateral amblyopia, nystagmus, and strabismus were described in single individuals. Ears tended to be large with fleshy lobes, long, and low set; one individual had a preauricular pit. The facial features of individual 2 (Figure 2) were slightly coarser than those of the other six individuals, which might reflect the additional sequence variants present. Feeding problems, particularly difficulties with swallowing and chewing, were noted by several families and physicians. Two children had congenital heart defects; one had a mitral valve prolapse, and the other had a ventricular septal defect with a patent ductus arteriosus (Table 1 and Table S3). Four of the seven children had either an inguinal hernia or hypospadias repaired at a young age. Also, 4/7 children had skeletal abnormalities that required varying degrees of intervention. Thoracic scoliosis, kyphosis, and lordosis were reported, and two children had a significant leg-length discrepancy (one of them also had talipes and hypoplasia of the left calf and required surgery). All children had intellectual impairment, although all were able to talk and communicate their needs. Speech, language, and motor developmental



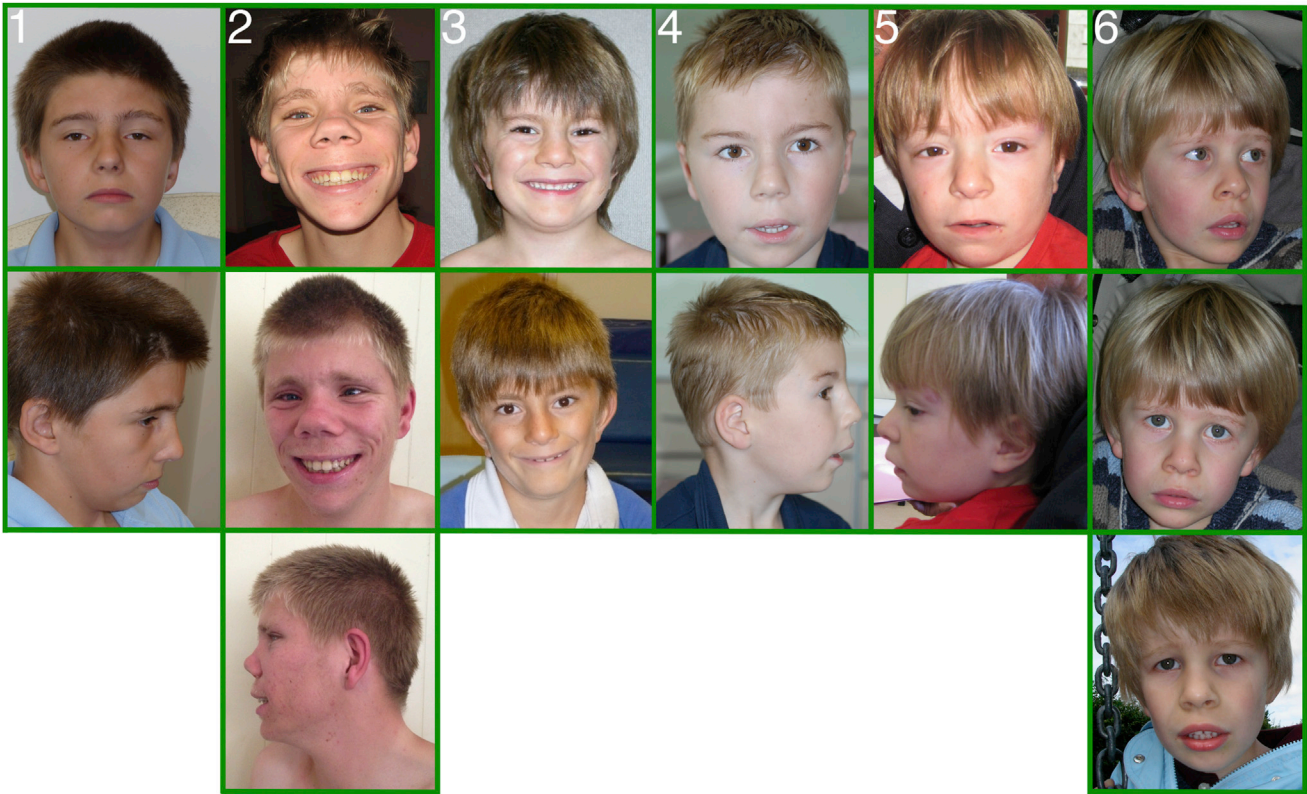

**Figure 2. Facial Appearance of the Individuals with *SETD5* Mutations**

Columns numbered 1–6 correspond to families 1–6, respectively, in Figure 1. Photographs from family 7 were unavailable for publication.

delay were noted in all individuals. Behavioral problems were a prominent feature of several of the children (5/7) and ranged from obsessive-compulsive disorder to hand flapping with ritualized behavior to features of autism. Involuntary movements and an exaggerated startle response were noted in several individuals, although in none were these a sustained feature over time. Older children had required special schooling because of their ID and behavioral problems, although some attended mainstream school at a young age but required educational statements and extra support. Growth parameters were within the normal range in all children, none had microcephaly or seizures, and all were born without antenatal or postnatal difficulties. Brain MRI was normal in one individual and was not performed in the remaining six individuals.

Although multiple LoF variants in *SETD5* have not been described previously in PubMed, this gene is one of three genes—*THUMPD3*, *SETD5*, and *THUMPD3-AS1* (a non-protein-coding gene)—within the critical region for 3p25 microdeletion syndrome.<sup>12</sup> Distal haploinsufficiency of chromosomal region 3p25 has long been associated with a clinical syndrome characterized by ID, low birth weight, microcephaly, telecanthus, ptosis, micrognathia, cleft palate, and congenital heart disease. Initially, the critical interval that defined the microdele-

tion syndrome was a 4.3 Mb region that was both large and gene dense.<sup>13</sup> It was not clear whether deletion of a single dosage-sensitive gene within this region was sufficient to cause the syndrome or whether the phenotype was a composite of multiple gene losses. Defining the minimum common overlap of deletions in multiple individuals has reduced the critical region for 3p25 microdeletion syndrome to three genes within a 124 kb interval.<sup>12</sup> The individuals with the smaller deletion within 3p25 have been reported to have a common phenotype of ID, hypotonia, a depressed nasal bridge, and a long philtrum. The presence of congenital heart disease and cleft palate is a more variable feature. Additional features also seen in the individuals reported with the smallest 3p25 microdeletion include synophrys, microcephaly, ptosis, abnormal palpebral fissures, postaxial polydactyly, scoliosis, cleft palate, gastrointestinal anomalies, and seizures.<sup>12,14–16</sup> The similarity between these individuals with haploinsufficiency of 3p25 and the individuals reported here to have *SETD5* truncating mutations is of note (Table 1). We suggest that similar to *EHMT1* mutations in 9q34 for Kleefstra syndrome (MIM 610253) and *KANSL1* mutations in 17q21 for Koolen-de Vries syndrome (MIM 610443), LoF mutations in *SETD5* might be sufficient to cause many of the features of 3p25 microdeletion syndrome.

**Table 1. Clinical Features of the Individuals with *SETD5* Mutations and Comparison to Individuals with 3p25 Microdeletion Syndrome**

| Clinical Features                                | Individuals with <i>SETD5</i> LoF Mutations (n = 7) | Individuals with a 3p25 Deletion (n = 4) |
|--------------------------------------------------|-----------------------------------------------------|------------------------------------------|
| Intellectual disability                          | 7                                                   | 4                                        |
| Language delay and/or stammer                    | 6                                                   | NA                                       |
| Ritualized behavior and/or autism                | 5                                                   | NA                                       |
| Seizures                                         | 0                                                   | 2                                        |
| Low birth weight and/or growth retardation       | 0                                                   | 2                                        |
| Microcephaly                                     | 0                                                   | 2                                        |
| Brachycephaly                                    | 3                                                   | NA                                       |
| Low-set and/or malformed ears                    | 5                                                   | 3                                        |
| Synophrys and/or abnormal eyebrows               | 5                                                   | 1                                        |
| Hypertelorism                                    | 0                                                   | 1                                        |
| Ptosis                                           | 1                                                   | 2                                        |
| Upslanting or downslanting palpebral fissures    | 6                                                   | 1                                        |
| Depressed nasal bridge                           | 3                                                   | 3                                        |
| Abnormal nasal shape                             | 7                                                   | NA                                       |
| Long, smooth, and/or prominent philtrum          | 5                                                   | 3                                        |
| Thin upper lip                                   | 5                                                   | NA                                       |
| Micrognathia                                     | 3                                                   | NA                                       |
| Cleft palate                                     | 0                                                   | 1                                        |
| Postaxial polydactyly                            | 1                                                   | 1                                        |
| Scoliosis or kyphosis                            | 4                                                   | 1                                        |
| Leg-length discrepancy                           | 2                                                   | NA                                       |
| Feeding difficulties                             | 5                                                   | NA                                       |
| Congenital heart defects                         | 2                                                   | 2                                        |
| Gastrointestinal and/or abdominal-wall anomalies | 5                                                   | 1                                        |

Data for the 3p25 deletion were adapted from Kellogg et al.<sup>12</sup> The following abbreviations are used: LoF, loss of function; and NA, not available.

Further evidence of the potential pathogenicity of mutations in *SETD5* is the observation of a single de novo LoF variant in an ID cohort and of de novo missense variants in two autism cohorts, although additional detailed phenotypic data have not been reported.<sup>10,17,18</sup>

*SETD5* is a methyltransferase on the basis of sequence homology to other SET domain proteins.<sup>19</sup> It is highly conserved throughout mammalian species, suggesting that it is functionally important, although little is known yet of its specific role. *SETD5* is ubiquitously

expressed, and especially high levels of *SETD5* expression have been noted in the brain.<sup>20</sup> On the basis of the other family members of this gene group, *SETD5* is likely to be important in the control of histone modification of DNA and to act as a regulator of transcription. Genes encoding methyltransferases specifically and genes encoding histone modifiers in general are increasingly recognized to have a major contribution to the phenotype of ID.<sup>21</sup> Genes encoding histone modifiers include *MECP2* (MIM 300005), *EHMT1* (MIM 607001), *NSD1* (MIM 606681), *KMT2D* (MIM 602113), *KDM6A* (MIM 300128), and *KDM5C* (MIM 314690).<sup>22–28</sup> These genes are all dosage sensitive, and haploinsufficiency alone is recognized to be sufficient to cause disease.<sup>21</sup>

Here, we present an analysis of children and young adults who were recruited to the Genetics of Learning Disability study with moderate to severe ID as the predominant clinical phenotype. This analysis provides sufficient evidence that loss of function of *SETD5* is a relatively frequent cause of ID and occurs as a rare de novo mutational event. The high number of LoF mutations in this cohort (7/996 [0.7%]) suggests that *SETD5* mutations, with a prevalence comparable to that of mutations in *ARID1B*,<sup>29</sup> might be one of the more common causes of ID. The affected individuals showed phenotypic similarity to those previously reported with a deletion in the critical region of 3p25. Prior to mutation analysis, the clinical features alone were not sufficient or consistent for clinicians to delineate this syndrome. In none of the individuals we report was a 3p25 microdeletion syndrome clinically suspected. Genotype-driven syndrome recognition is likely to be increasingly used in the future as more subtle phenotypes emerge. This, however, poses concerns of overinterpreting the phenotypic features and the need for large data sets for distinguishing rare pertinent phenotypic associations from rare incidental findings.

### Supplemental Data

Supplemental Data include three tables and can be found with this article online at <http://www.cell.com/ajhg>.

### Acknowledgments

We are indebted to all individuals who participated in the study. This study made use of data generated by the UK10K Project. Funding for the UK10K Project was provided by the Wellcome Trust under award WT091310. A full list of consortium members can be found at the UK10K Project website. This study was supported by grants from Action Medical Research, the Birth Defect Foundation, and the Cambridge National Institute for Health Research Biomedical Research Centre.

Received: January 7, 2014

Accepted: March 11, 2014

Published: March 27, 2014

## Web Resources

The URLs for data presented herein are as follows:

1000 Genomes, <http://www.1000genomes.org>  
Genetics Home Reference, Chromatin-modifying enzymes gene family, <http://ghr.nlm.nih.gov/geneFamily/chromatin-modifyingenzymes>  
DECIPHER, <http://decipher.sanger.ac.uk/>  
Ensembl Genome Browser, <http://www.ensembl.org/index.html>  
Mutalyzer, <https://mutalyzer.nl/index>  
NCBI, <http://www.ncbi.nlm.nih.gov>  
NCBI HomoloGene, <http://www.ncbi.nlm.nih.gov/homologene>  
NHLBI Exome Sequencing Project (ESP) Exome Variant Server, <http://evs.gs.washington.edu/EVS/>  
Online Mendelian Inheritance in Man (OMIM), <http://omim.org>  
RefSeq, <http://www.ncbi.nlm.nih.gov/RefSeq>  
UCSC Genome Browser, <http://genome-euro.ucsc.edu>  
UK10K Project, <http://www.uk10k.org/>

## References

- van Bokhoven, H. (2011). Genetic and epigenetic networks in intellectual disabilities. *Annu. Rev. Genet.* 45, 81–104.
- Piton, A., Redin, C., and Mandel, J.L. (2013). XLID-causing mutations and associated genes challenged in light of data from large-scale human exome sequencing. *Am. J. Hum. Genet.* 93, 368–383.
- Xue, Y., Chen, Y., Ayub, Q., Huang, N., Ball, E.V., Mort, M., Phillips, A.D., Shaw, K., Stenson, P.D., Cooper, D.N., and Tyler-Smith, C.; 1000 Genomes Project Consortium (2012). Deleterious- and disease-allele prevalence in healthy individuals: insights from current predictions, mutation databases, and population-scale resequencing. *Am. J. Hum. Genet.* 91, 1022–1032.
- Li, H., and Durbin, R. (2009). Fast and accurate short read alignment with Burrows-Wheeler transform. *Bioinformatics* 25, 1754–1760.
- Li, H., Handsaker, B., Wysoker, A., Fennell, T., Ruan, J., Homer, N., Marth, G., Abecasis, G., and Durbin, R.; 1000 Genome Project Data Processing Subgroup (2009). The Sequence Alignment/Map format and SAMtools. *Bioinformatics* 25, 2078–2079.
- McKenna, A., Hanna, M., Banks, E., Sivachenko, A., Cibulskis, K., Kernytzky, A., Garimella, K., Altshuler, D., Gabriel, S., Daly, M., and DePristo, M.A. (2010). The Genome Analysis Toolkit: a MapReduce framework for analyzing next-generation DNA sequencing data. *Genome Res.* 20, 1297–1303.
- Danecek, P., Auton, A., Abecasis, G., Albers, C.A., Banks, E., DePristo, M.A., Handsaker, R.E., Lunter, G., Marth, G.T., Sherry, S.T., et al.; 1000 Genomes Project Analysis Group (2011). The variant call format and VCFtools. *Bioinformatics* 27, 2156–2158.
- McLaren, W., Pritchard, B., Rios, D., Chen, Y., Flicek, P., and Cunningham, F. (2010). Deriving the consequences of genomic variants with the Ensembl API and SNP Effect Predictor. *Bioinformatics* 26, 2069–2070.
- Robinson, J.T., Thorvaldsdóttir, H., Winckler, W., Guttman, M., Lander, E.S., Getz, G., and Mesirov, J.P. (2011). Integrative genomics viewer. *Nat. Biotechnol.* 29, 24–26.
- Rauch, A., Wieczorek, D., Graf, E., Wieland, T., Endeke, S., Schwarzmayr, T., Albrecht, B., Bartholdi, D., Beygo, J., Di Donato, N., et al. (2012). Range of genetic mutations associated with severe non-syndromic sporadic intellectual disability: an exome sequencing study. *Lancet* 380, 1674–1682.
- Kryukov, G.V., Pennacchio, L.A., and Sunyaev, S.R. (2007). Most rare missense alleles are deleterious in humans: implications for complex disease and association studies. *Am. J. Hum. Genet.* 80, 727–739.
- Kellogg, G., Sum, J., and Wallerstein, R. (2013). Deletion of 3p25.3 in a patient with intellectual disability and dysmorphic features with further definition of a critical region. *Am. J. Med. Genet. A.* 161A, 1405–1408.
- Shuib, S., McMullan, D., Rattenberry, E., Barber, R.M., Rahman, F., Zatyka, M., Chapman, C., Macdonald, F., Latif, F., Davison, V., and Maher, E.R. (2009). Microarray based analysis of 3p25-p26 deletions (3p- syndrome). *Am. J. Med. Genet. A.* 149A, 2099–2105.
- Gunnarsson, C., and Foyen Bruun, C. (2010). Molecular characterization and clinical features of a patient with an interstitial deletion of 3p25.3-p26.1. *Am. J. Med. Genet. A.* 152A, 3110–3114.
- Peltekova, I.T., Macdonald, A., and Armour, C.M. (2012). Microdeletion on 3p25 in a patient with features of 3p deletion syndrome. *Am. J. Med. Genet. A.* 158A, 2583–2586.
- Riess, A., Grasshoff, U., Schäferhoff, K., Bonin, M., Riess, O., Horber, V., and Tzschach, A. (2012). Interstitial 3p25.3-p26.1 deletion in a patient with intellectual disability. *Am. J. Med. Genet. A.* 158A, 2587–2590.
- Iossifov, I., Ronemus, M., Levy, D., Wang, Z., Hakker, I., Rosenbaum, J., Yamrom, B., Lee, Y.H., Narzisi, G., Leotta, A., et al. (2012). De novo gene disruptions in children on the autistic spectrum. *Neuron* 74, 285–299.
- Neale, B.M., Kou, Y., Liu, L., Ma'ayan, A., Samocha, K.E., Sabo, A., Lin, C.F., Stevens, C., Wang, L.S., Makarov, V., et al. (2012). Patterns and rates of exonic de novo mutations in autism spectrum disorders. *Nature* 485, 242–245.
- UniProt Consortium (2013). Update on activities at the Universal Protein Resource (UniProt) in 2013. *Nucleic Acids Res.* 41 (Database issue), D43–D47.
- Nagase, T., Kikuno, R., Hattori, A., Kondo, Y., Okumura, K., and Ohara, O. (2000). Prediction of the coding sequences of unidentified human genes. XIX. The complete sequences of 100 new cDNA clones from brain which code for large proteins in vitro. *DNA Res.* 7, 347–355.
- Berdasco, M., and Esteller, M. (2013). Genetic syndromes caused by mutations in epigenetic genes. *Hum. Genet.* 132, 359–383.
- Amir, R.E., Van den Veyver, I.B., Wan, M., Tran, C.Q., Francke, U., and Zoghbi, H.Y. (1999). Rett syndrome is caused by mutations in X-linked MECP2, encoding methyl-CpG-binding protein 2. *Nat. Genet.* 23, 185–188.
- Kleefstra, T., Brunner, H.G., Amiel, J., Oudakker, A.R., Nillesen, W.M., Magee, A., Geneviève, D., Cormier-Daire, V., van Esch, H., Fryns, J.P., et al. (2006). Loss-of-function mutations in euchromatin histone methyl transferase 1 (EHMT1) cause the 9q34 subtelomeric deletion syndrome. *Am. J. Hum. Genet.* 79, 370–377.
- Kurotaki, N., Imaizumi, K., Harada, N., Masuno, M., Kondoh, T., Nagai, T., Ohashi, H., Naritomi, K., Tsukahara, M., Makita, Y., et al. (2002). Haploinsufficiency of NSD1 causes Sotos syndrome. *Nat. Genet.* 30, 365–366.
- Ng, S.B., Bigham, A.W., Buckingham, K.J., Hannibal, M.C., McMillin, M.J., Gildersleeve, H.I., Beck, A.E., Tabor, H.K., Cooper, G.M., Mefford, H.C., et al. (2010). Exome sequencing

- identifies MLL2 mutations as a cause of Kabuki syndrome. *Nat. Genet.* *42*, 790–793.
26. Hannibal, M.C., Buckingham, K.J., Ng, S.B., Ming, J.E., Beck, A.E., McMillin, M.J., Gildersleeve, H.I., Bigham, A.W., Tabor, H.K., Mefford, H.C., et al. (2011). Spectrum of MLL2 (ALR) mutations in 110 cases of Kabuki syndrome. *Am. J. Med. Genet. A.* *155A*, 1511–1516.
27. Lederer, D., Grisart, B., Digilio, M.C., Benoit, V., Crespín, M., Ghariani, S.C., Maystadt, I., Dallapiccola, B., and Verellen-Dumoulin, C. (2012). Deletion of KDM6A, a histone demethylase interacting with MLL2, in three patients with Kabuki syndrome. *Am. J. Hum. Genet.* *90*, 119–124.
28. Jensen, L.R., Amende, M., Gurok, U., Moser, B., Gimmel, V., Tzschach, A., Janecke, A.R., Tariverdian, G., Chelly, J., Fryns, J.P., et al. (2005). Mutations in the JARID1C gene, which is involved in transcriptional regulation and chromatin remodeling, cause X-linked mental retardation. *Am. J. Hum. Genet.* *76*, 227–236.
29. Hoyer, J., Ekici, A.B., Ende, S., Popp, B., Zweier, C., Wiesener, A., Wohlleber, E., Dufke, A., Rossier, E., Petsch, C., et al. (2012). Haploinsufficiency of ARID1B, a member of the SWI/SNF-a chromatin-remodeling complex, is a frequent cause of intellectual disability. *Am. J. Hum. Genet.* *90*, 565–572.

The American Journal of Human Genetics, Volume 94

Supplemental Data

**De Novo Loss-of-Function Mutations in *SETD5*, Encoding a Methyltransferase in a 3p25 Microdeletion Syndrome Critical Region, Cause Intellectual Disability**

Detelina Grozeva, Keren Carss, Olivera Spasic-Boskovic, Michael J. Parker, Hayley Archer, Helen V. Firth, Soo-Mi Park, Natalie Canham, Susan E. Holder, Meredith Wilson, Anna Hackett, Michael Field, James A.B. Floyd, UK10K Consortium, Matthew Hurles, and F. Lucy Raymond



Table S1: List of the 565 Genes that were Selected for Targeted Next Generation Sequencing

**Gene IDs**

*ABCD1*  
*ACBD6*  
*ACE2*  
*ACIN1*  
*ACOT9*  
*ACSL4*  
*ACTL6A*  
*ACTL6B*  
*ACY1*  
*ADCK3*  
*ADK*  
*ADRA2B*  
*ADSL*  
*AFF2*  
*AGA*  
*AGTR2*  
*AIMP1*  
*AKAP17A*  
*AKAP4*  
*ALDH18A1*  
*ALDH4A1*  
*ALDH5A1*  
*ALG1*  
*ALG12*  
*ALG13*  
*ALG3*  
*ALG6*  
*ALG8*  
*ANK3*  
*AP1S2*  
*AP4B1*  
*AP4E1*  
*AP4M1*  
*AP4S1*  
*ARFGEF2*  
*ARG1*  
*ARHGAP36*  
*ARHGAP6*  
*ARHGEF4*  
*ARHGEF6*  
*ARHGEF9*  
*ARID1A*

ARID1B  
ARID2  
ARIH1  
ARL14EP  
ARSF  
ARX  
ASB12  
ASCC3  
ASCL1  
ASH1L  
ASMT  
ASMTL  
ASXL1  
ATM  
ATP2B3  
ATP7A  
ATRX  
ATXN3L  
AUH  
AVPR2  
AWAT2  
BCOR  
BCORL1  
BDP1  
BMP15  
BRAF  
BRWD3  
BTK  
C12orf57  
CA8  
CACNA1F  
CACNA1G  
CAMK2A  
CAMK2G  
CAP1  
CAPN10  
CASK  
CASP2  
CC2D1A  
CC2D2A  
CCDC22  
CCDC23  
CCNA2  
CCNB3  
CD99  
CDH15

CDK16  
CDK8  
CDKL5  
CEP41  
CFP  
CHD2  
CHD7  
CHL1  
CLCN4  
CLCN5  
CLIC2  
CMC4  
CNKSR1  
CNKSR2  
CNTNAP2  
COL4A3BP  
COL4A6  
COQ5  
COX10  
CPXCR1  
CREBBP  
CRLF2  
CSF2RA  
CSTF2  
CTNNB1  
CTPS2  
CTSD  
CTTNBP2  
CUL4B  
CUX2  
CXORF22  
CXORF58  
CYP7B1  
DCHS2  
DCX  
DDOST  
DDX26B  
DDX3X  
DDX53  
DEAF1  
DGKH  
DHCR7  
DHRSX  
DHX30  
DIAPH2  
DKC1

DLG1  
DLG2  
DLG3  
DLG4  
DMD  
DNMT3B  
DOCK11  
DPF1  
DPF2  
DPF3  
DYNC1H1  
DYRK1A  
EEF1A2  
EEF1B2  
EHMT1  
EIF2C1  
EIF2S3  
ELK1  
ELP2  
ENOX2  
ENTHD2  
ENTPD1  
EP300  
EPPK1  
ERCC6  
ERLIN2  
ESX1  
EXOSC3  
FAAH2  
FAM120C  
FAM47B  
FAM58A  
FASN  
FGD1  
FKBPL  
FKRP  
FKTN  
FLNA  
FMR1  
FOXG1  
FOXP1  
FRMPD4  
FRY  
FTL  
FTSJ1  
GAB3

GABRQ  
GAD1  
GATAD2B  
GCDH  
GCH1  
GDI1  
GJC2  
GK  
GLB1  
GLRA2  
GM2A  
GON4L  
GPC3  
GPR112  
GPR56  
GPRASP1  
GRB14  
GRIA1  
GRIA2  
GRIA3  
GRIK2  
GRIN2A  
GRIN2B  
GSPT2  
GTPBP8  
HAUS7  
HCCS  
HCFC1  
HDAC4  
HDAC8  
HDHD1  
HEXA  
HEXB  
HGSNAT  
HIST1H4B  
HIST3H3  
HIVEP2  
HPRT1  
HRAS  
HS6ST2  
HSD17B10  
HSPD1  
HUWE1  
IDS  
IDUA  
IFNAR2



IGSF1  
IKBKG  
IL1RAPL1  
IL3RA  
INPP4A  
INPP5E  
IQSEC2  
ITGA4  
ITIH6  
KANK1  
KANSL1  
KAT6B  
KCNC3  
KCND1  
KCNH1  
KCNK12  
KCNQ3  
KDM1A  
KDM5A  
KDM5C  
KDM6B  
KIAA2022  
KIF1A  
KIF26B  
KIF4A  
KIF5C  
KIF7  
KIRREL3  
KLHL15  
KLHL21  
KLHL34  
KLHL4  
KMT2D  
KRAS  
L1CAM  
LAMA1  
LAMP2  
LARP7  
LAS1L  
LHFPL3  
LIMK1  
LINS  
LRP1  
LRP2  
LRRK1  
MAGEA11

MAGEB1  
MAGEB10  
MAGEB2  
MAGEC1  
MAGEC3  
MAGED1  
MAGEE2  
MAGIX  
MAGT1  
MAN1B1  
MAOA  
MAOB  
MAP2K1  
MAP2K2  
MAP3K15  
MAP7D3  
MBD5  
MBNL3  
MECP2  
MED12  
MED17  
MED23  
MEF2C  
MGAT5B  
MIB1  
MID1  
MLC1  
MLH1  
MLL3  
MLYCD  
MMAA  
MMAB  
MMADHC  
MORC4  
MSL3  
MTF1  
MTMR1  
MTMR8  
MXRA5  
MYO1D  
MYO1G  
MYT1L  
NA  
NAA10  
NDE1  
NDP

NDST1  
NDUFA1  
NECAB2  
NEU1  
NF1  
NFIX  
NHS  
NKAP  
NLGN3  
NLGN4X  
NR1I3  
NRK  
NRXN1  
NRXN2  
NSD1  
NSDHL  
NSUN2  
NTM  
NXF4  
NXF5  
OCRL  
ODF2L  
OFD1  
OGT  
OPHN1  
OR5M1  
OTC  
OXCT1  
P2RY4  
P2RY8  
PABPC5  
PAFAH1B1  
PAH  
PAK3  
PARP1  
PASD1  
PAX6  
PBRM1  
PC  
PCDH10  
PCDH19  
PCNT  
PDHA1  
PECR  
PEPD  
PGK1

PGRMC1  
PHACTR1  
PHF10  
PHF6  
PHF8  
PHIP  
PHKA1  
PIGN  
PIK3C3  
PIN4  
PJA1  
PLA2G6  
PLCXD1  
PLP1  
PLXNB3  
PNKP  
POLA1  
POLR3A  
POLR3B  
PORCN  
PPP2R5D  
PPT1  
PQBP1  
PRDX4  
PRICKLE3  
PRMT10  
PROX2  
PRPS1  
PRRG1  
PRRG3  
PRRT2  
PRSS12  
PSMA7  
PSMD10  
PTCHD1  
PTEN  
PTPN11  
PTPN21  
RAB39B  
RAB3GAP1  
RAB40AL  
RABL6  
RAF1  
RAI1  
RALGDS  
RAPGEF1

RBM10  
RENBP  
RGAG1  
RGN  
RGS7  
RLIM  
RNASET2  
RPGR  
RPS6KA3  
SATB2  
SCAPER  
SCN2A  
SCN8A  
SETBP1  
SETD5  
SETDB2  
SGSH  
SHANK1  
SHANK2  
SHANK3  
SHOC2  
SHOX  
SHROOM2  
SHROOM4  
SLC12A6  
SLC16A2  
SLC25A22  
SLC25A53  
SLC25A6  
SLC26A9  
SLC2A1  
SLC31A1  
SLC6A1  
SLC6A17  
SLC6A8  
SLC9A6  
SMARCA2  
SMARCA4  
SMARCB1  
SMARCC1  
SMARCC2  
SMARCD1  
SMARCD2  
SMARCD3  
SMARCE1  
SMC1A



SMS  
SNTG1  
SOS1  
SOX3  
SOX5  
SPG11  
SPRED1  
SPRY3  
SPTAN1  
SPTLC2  
SREBF2  
SRGAP3  
SRPX2  
ST3GAL3  
STAB2  
STAG1  
STARD8  
STXBP1  
SYN1  
SYNCRIP  
SYNE1  
SYNGAP1  
SYP  
SYT1  
SYTL4  
SYTL5  
TAF1  
TAF2  
TAF7L  
TANC2  
TAT  
TBC1D24  
TBC1D8B  
TCEAL3  
TCF4  
TCP10L2  
TENM1  
THAP1  
THOC2  
ThumpD1  
TIMM8A  
TKTL1  
TLR8  
TM4SF2  
TMEM132E  
TMEM135

TMLHE  
TNKS2  
TNPO2  
TRAPPC9  
TRES2  
TRIO  
TRMT1  
TSC1  
TSC2  
TSC22D3  
TSEN2  
TSEN34  
TSEN54  
TSPAN7  
TTI2  
TUBA1A  
TUBA8  
TUBAL3  
TUBB2B  
TUSC3  
UBE2A  
UBE3A  
UBR1  
UBR7  
UBTF  
UPF3B  
USP27X  
USP9X  
UTP14A  
VAMP7  
VLDLR  
VPS13B  
VRK1  
WAC  
WDR11  
WDR13  
WDR45L  
WDR62  
WNK3  
WWC3  
XIAP  
XKRX  
YY1  
ZBTB40  
ZC3H14  
ZCCHC12

ZCCHC8  
ZDHHC15  
ZDHHC9  
ZEB2  
ZFHX4  
ZFX  
ZFYVE26  
ZMYM3  
ZMYM6  
ZMYND12  
ZNF238  
ZNF41  
ZNF425  
ZNF526  
ZNF674  
ZNF711  
ZNF81

Table S2: Rationale for Prioritisation of Genes for Further Investigation

Top ranked genes according to number of rare variants in the ID cohort (frequency <1% 1000 genomes, UK10K twins cohort, NHLBI GO Exome Sequencing Project Exome Variant Server (NHLBI EVS), internal cohort 2172 individuals where whole exomes were sequenced at the same laboratory (UK10K) and the UK10K rare replication cohort itself (including all phenotypes))

LoF=Loss of function

| ID gene | Number observed LoF variants | Frequency in ID cohort (%) |
|---------|------------------------------|----------------------------|
| DCHS2   | 22                           | 2.2                        |
| SYNE1   | 13                           | 1.3                        |
| VPS13B  | 10                           | 1.0                        |
| MIB1    | 9                            | 0.9                        |
| NF1     | 9                            | 0.9                        |
| ATM     | 8                            | 0.8                        |
| PAH     | 7                            | 0.7                        |
| PCDH10  | 7                            | 0.7                        |
| SETD5   | 7                            | 0.7                        |
| ASCC3   | 6                            | 0.6                        |
| ATRX    | 6                            | 0.6                        |
| UTP14A  | 6                            | 0.6                        |
| HEXA    | 6                            | 0.6                        |
| CC2D2A  | 6                            | 0.6                        |
| STAB2   | 6                            | 0.6                        |

There are 15 genes in the ranking 1-10 as six genes were =10th with six observed LoF variants

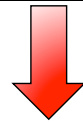

The table from above was annotated with information as to how many of the variants are independent or if the same variants have been seen in multiple individuals  
The criterion for independence was selected as it is unlikely that recurrent LoF variants in a gene will cause ID within the cohort

| ID gene | Number observed LoF variants | Frequency in ID cohort (%) | How many are independent LoFs?                                               | Number Independent LoFs |
|---------|------------------------------|----------------------------|------------------------------------------------------------------------------|-------------------------|
| DCHS2   | 22                           | 2.2                        | 6 variants seen once; 1 variant seen 2 times; 1 seen 6 times; 1 seen 8 times | 9                       |
| SYNE1   | 13                           | 1.3                        | 3 variants seen once; 1 variant seen 2 times; 1 variant seen 8 times         | 5                       |
| VPS13B  | 10                           | 1.0                        | 5 variants seen once; 1 variant seen 2 times; 1 variant seen 3 times         | 7                       |
| MIB1    | 9                            | 0.9                        | 5 variants seen once; 2 variants seen 2 times                                | 7                       |
| NF1     | 9                            | 0.9                        | 1 variant seen once; 1 variant seen 2 times; 1 variant seen 6 times          | 3                       |
| ATM     | 8                            | 0.8                        | 6 variants seen once; 1 variant seen 2 times                                 | 7                       |
| PAH     | 7                            | 0.7                        | 4 variants seen once, 1 variant seen 3 times                                 | 5                       |
| PCDH10  | 7                            | 0.7                        | 1 variant seen 7 times                                                       | 1                       |
| SETD5   | 7                            | 0.7                        | 7 variants seen once                                                         | 7                       |
| ASCC3   | 6                            | 0.6                        | 6 variants seen once                                                         | 6                       |
| ATRX    | 6                            | 0.6                        | 3 variants seen once; 1 variant seen 3 times                                 | 4                       |
| UTP14A  | 6                            | 0.6                        | 1 variant seen 6 times                                                       | 1                       |
| HEXA    | 6                            | 0.6                        | 2 variants seen once; 2 variants seen 2 times                                | 4                       |
| CC2D2A  | 6                            | 0.6                        | 6 variants seen once                                                         | 6                       |
| STAB2   | 6                            | 0.6                        | 6 variants seen once                                                         | 6                       |

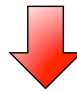

Sorted according to "Number Independent LoFs" column; Further information was added about the mode of inheritance, if it is a known or candidate gene, frequency of LoF variants in the NHLBI Exome sequencing Project and the reason why the corresponding gene is excluded from further investigation

| ID gene | Number Independent LoFs | Mode of inheritance             | Known or candidate gene | Frequency NHLBI EVS LoF | Reason exclusion further analysis                                                                                                                         |
|---------|-------------------------|---------------------------------|-------------------------|-------------------------|-----------------------------------------------------------------------------------------------------------------------------------------------------------|
| DCHS2   | 9                       | Unknown                         | Candidate               | 13                      | Difficult to make judgement about possible pathogenicity of LoF variants in this gene as many were observed a few times; in addition 13 LoFs in NHLBI EVS |
| SETD5   | 7                       | Unknown                         | Candidate               | 1                       |                                                                                                                                                           |
| ATM     | 7                       | Recessive                       | Known                   | 8                       | Known gene; recessive inheritance                                                                                                                         |
| VPS13B  | 7                       | Recessive                       | Known                   | 17                      | Known gene                                                                                                                                                |
| MIB1    | 7                       | Unknown                         | Candidate               | 13                      | Difficult to make judgement about possible pathogenicity of LoF variants in this gene as there are 12 LoF variants observed in NHLBI EVS                  |
| ASCC3   | 6                       | Recessive                       | Known                   | 7                       | Known gene; recessive inheritance                                                                                                                         |
| CC2D2A  | 6                       | Recessive or Autosomal Dominant | Known                   | 8                       | Known gene                                                                                                                                                |
| STAB2   | 6                       | Unknown                         | Candidate               | 12                      | Difficult to make judgement about possible pathogenicity of LoF variants in this gene as there are 12 LoF variants observed in NHLBI EVS                  |
| PAH     | 5                       | Recessive                       | Known                   | 4                       | Known gene                                                                                                                                                |
| SYNE1   | 5                       | Recessive                       | Known                   | 17                      | Known gene                                                                                                                                                |
| ATRX    | 4                       | Hemizygous                      | Known                   | 0                       | Known gene                                                                                                                                                |
| HEXA    | 4                       | Recessive                       | Known                   | 4                       | Known gene                                                                                                                                                |
| NF1     | 3                       | Autosomal Dominant              | Known                   | 3                       | Known gene                                                                                                                                                |
| PCDH10  | 1                       | Unknown                         | Candidate               | 1                       | No independent variants in this gene                                                                                                                      |
| UTP14A  | 1                       | Unknown                         | Candidate               | 0                       | No independent variants in this gene                                                                                                                      |

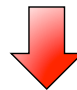

SETD5 was selected for further investigation based on:  
One of the genes with high number of independent LoFs  
Candidate gene, not previously implicated in ID  
Only one LoF observed in the publicly available data from NHLBI EVS

Table S3: Clinical Features of the Individuals with *SETD5* Mutations

| <b>FAMILY</b>                           | <b>1</b> | <b>2</b> | <b>3</b> | <b>4</b> | <b>5</b> | <b>6</b> | <b>7</b> |
|-----------------------------------------|----------|----------|----------|----------|----------|----------|----------|
| birth weight (kg)                       | 2.47     | 2.69     | 2.99     | 3.66     | 2.41     | 2.95     | small    |
| gestation (weeks)                       | 34       | 38       | term     | term     | 35+5     | term     | term     |
| Recent height (percentile)              |          | 50-75th  | 2nd      |          | 25-50th  |          |          |
| Recent weight (percentile)              |          |          | 9th      |          | 25-50th  |          |          |
| Recent Head Circumference (percentile)  | 25th     | 75-98th  | 50-75th  | 10-25th  | 75-91st  | 75th     | 10th     |
| <b>SPINE and SKELETON</b>               |          |          |          |          |          |          |          |
| leg length discrepancy                  | y        | y        |          |          |          |          |          |
| shortened 4th and 5th metacarpal        |          | y        |          |          |          |          |          |
| hypoplasia of left calf                 |          | y        |          |          |          |          |          |
| scoliosis or kyphosis                   | y        | y        |          |          |          |          |          |
| lordosis                                |          |          | y        |          |          | y        |          |
| sacral dimple                           |          | y        |          |          | y        |          |          |
| stiff legged gait                       |          |          |          |          | y        | y        |          |
| bilateral 5th finger clinodactyly       |          |          | y        |          |          |          |          |
| brachdactyly                            |          |          | y        |          |          |          |          |
| post axial polydactyly; 2 hands, 1 foot |          |          |          | y        |          |          |          |
| <b>EARS</b>                             |          |          |          |          |          |          |          |
| large ears                              | y        |          | y        |          |          |          |          |
| fleshy ear lobes                        |          | y        |          |          | y        |          |          |
| long, narrow, low set ears              |          |          | y        |          |          |          | y        |
| preauricular pit                        | y        |          |          |          |          |          |          |
| <b>EYEBROWS</b>                         |          |          |          |          |          |          |          |
| full eyebrows                           |          | y        |          |          |          |          |          |
| synophrys                               | y        |          | y        |          |          |          | y        |
| straight eyebrows                       | y        |          |          |          |          |          |          |
| broad eyebrows                          |          |          |          |          |          |          | y        |
| cysts in eyebrows                       |          |          |          |          | y        |          |          |
| <b>HEAD SHAPE</b>                       |          |          |          |          |          |          |          |
| brachycephaly                           | y        | y        |          |          |          |          | y        |
| prominent high forehead                 |          |          |          |          | y        |          |          |
| <b>NOSE</b>                             |          |          |          |          |          |          |          |
| broad, thickened upturned nasal tip     |          | y        |          |          | y        |          |          |
| depressed nasal bridge                  |          | y        |          |          | y        | y        |          |
| anteverted nares                        |          | y        |          |          | y        |          |          |
| prominent high nasal root               |          |          | y        | y        | y        |          | y        |
| tubular nose                            | y        |          |          | y        | y        | y        |          |
| prominent nares                         |          |          | y        |          |          |          |          |
| <b>EYES</b>                             |          |          |          |          |          |          |          |
| left eye amblyopia                      |          | y        |          |          |          |          |          |
| long narrow fissures                    |          |          | y        |          | y        |          |          |
| mild ptosis                             |          |          |          |          | y        |          |          |
| nystagmus and strabismus                |          |          |          | y        |          |          |          |
| down slanting palpebral fissures        |          |          |          |          |          |          | y        |
| upslanting palpebral fissures           | y        |          | y        | y        | y        | y        |          |
| <b>MOUTH and LOWER FACE</b>             |          |          |          |          |          |          |          |
| long, smooth philtrum                   | y        | y        | y        | y        | y        |          |          |
| small mouth                             |          |          |          | y        |          |          | y        |
| short philtrum                          |          |          |          |          |          |          | y        |
| micrognathia                            | y        |          |          | y        |          |          | y        |
| thin upper lip                          | y        | y        | y        |          | y        |          | y        |
| high palate                             | y        |          |          |          |          |          | y        |



| <b>FEEDING AND SWALLOWING</b>          |   |   |  |  |   |   |   |
|----------------------------------------|---|---|--|--|---|---|---|
| feeding difficulties                   | y | y |  |  |   |   |   |
| crowded teeth                          |   | y |  |  |   | y | y |
| dribbling                              |   |   |  |  | y | y | y |
| difficulty chewing, oromotor dyspraxia |   |   |  |  | y | y |   |
| swallowing difficulties                |   | y |  |  |   | y |   |

| <b>BEHAVIOUR and DEVELOPMENT</b>       |          |           |            |          |             |                |                 |
|----------------------------------------|----------|-----------|------------|----------|-------------|----------------|-----------------|
| developmental delay                    | y        | y         | y          | y        | y           | y              | y               |
| walking (age)                          | y (2yrs) | y (3yrs)  | y (18mths) |          | y (2yrs)    | y (3yrs 2mths) | y (20mths)      |
| speech (age first words)               | y (4yrs) | y (4 yrs) | y (12mths) | y (late) | y (18 mths) | y (2 years)    |                 |
| expressive language delay              |          |           |            |          | y           | y              | y               |
| stammer                                | y        |           | y          | y        |             |                |                 |
| exaggerated startle response           |          |           |            |          |             | y              | y               |
| involuntary movements                  |          |           | y          |          |             | y              | y (until 10yrs) |
| hand flapping and ritualised behaviour | y        | y         |            |          | y           |                |                 |
| autistic                               | y        |           |            |          |             | y              |                 |
| obsessive compulsive disorder          | y        |           |            |          |             | y              | y               |

| <b>CONGENITAL HEART DISEASE</b> |   |   |  |  |  |  |  |
|---------------------------------|---|---|--|--|--|--|--|
| mitral valve prolapse           |   | y |  |  |  |  |  |
| VSD, PDA                        | y |   |  |  |  |  |  |

| <b>ABDOMINAL ORGAN DEVELOPMENT</b> |   |   |   |  |   |  |   |
|------------------------------------|---|---|---|--|---|--|---|
| paraumbilical hernia               |   |   |   |  | y |  |   |
| inguinal hernia                    |   | y |   |  |   |  | y |
| undescended testes                 |   | y |   |  | y |  |   |
| hypospadias                        | y |   | y |  |   |  |   |
| nocturnal enuresis                 |   |   |   |  |   |  | y |

| <b>OTHER</b>        |  |   |   |  |   |   |   |
|---------------------|--|---|---|--|---|---|---|
| fetal finger pads   |  | y |   |  |   |   |   |
| spiky hair          |  | y |   |  |   |   |   |
| saggy skin          |  |   |   |  | y |   |   |
| low hairline        |  |   | y |  |   | y | y |
| severe constipation |  |   | y |  |   | y |   |
